# Supplementary material
Source: PubMed Central journal article supplement (PMC3370630)
Supplement: supp_194.11.2809_FigS1-S2.pdf [file supp_194.11.2809_FigS1-S2.pdf]

Analyses of MbtB, MbtE, and MbtF Suggest Revisions to the Mycobactin  
Biosynthesis Pathway in *Mycobacterium tuberculosis*

Matthew D. McMahon<sup>a,b</sup>, Jason S. Rush<sup>c</sup>, and Michael G. Thomas<sup>a,b,1</sup>

<sup>a</sup> Department of Bacteriology, University of Wisconsin-Madison, Madison, WI, USA 53706

<sup>b</sup> Microbiology Doctoral Training Program, University of Wisconsin-Madison, Madison, WI, USA  
53706

<sup>c</sup> Department of Molecular, Cellular, and Developmental Biology, Yale University, New Haven,  
CT, USA 06511

**SUPPLEMENTAL MATERIAL**

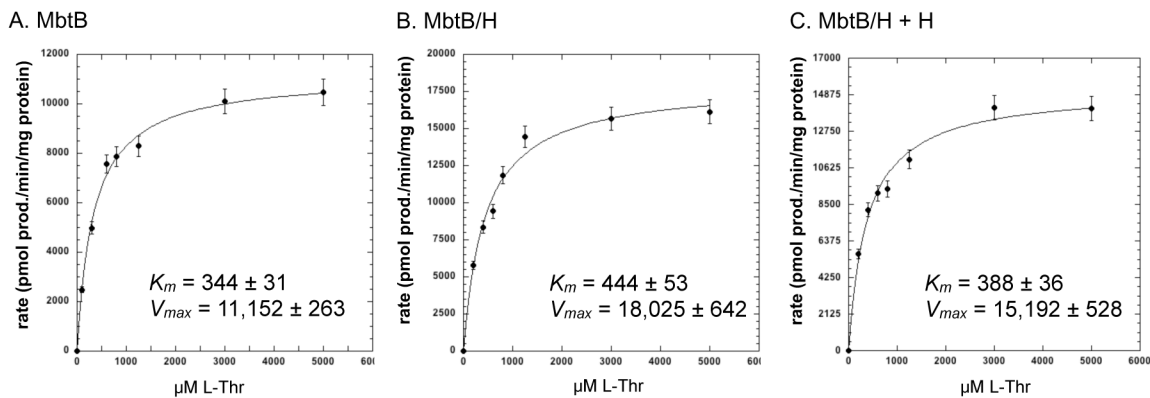

Figure S1. Michaelis-Menten plots from the analysis of L-Thr activation by the A domain of MbtB. (A) Plot of data for MbtB purified in the absence of MbtH. (B) Plot of data for MbtB purified in the presence of MbtH. (C) Plot of data for MbtB purified in the presence of MbtH with 100  $\mu\text{M}$  MbtH added to the reactions. The data presented are from three independent reactions performed in parallel. The points denote the average of the three reactions with the error bars representing the standard deviation of the points. The data were fit to the Michael-Menten equation and the  $K_m$  and  $V_{max}$  calculated from this curve fit are shown, with the standard error shown.

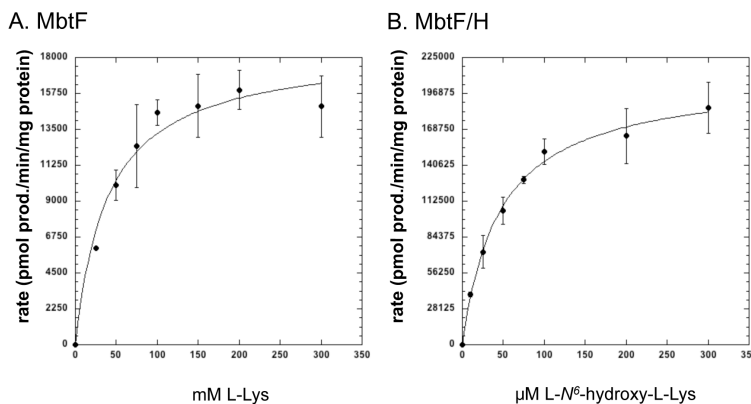

Figure S2. Michaelis-Menten plots from the analysis of amino acid specificity of the A domain of MbtF. (A) Plot of data for activation of L-Lys. (B) Plot of data for activation of  $N^6$ -hydroxy-L-Lys. The data presented are from three independent reactions performed in parallel. The points denote the average of the three reactions with the error bars representing the standard deviation of the points. The data were fit to the Michael-Menten equation and the  $K_m$  and  $V_{max}$  calculated from this curve fit are shown, with the standard error shown.
